# Supplementary material
Source: PubMed Central journal article supplement (PMC5829011)
Supplement: NIHMS936102-supplement-Legacy_Supplemental_File.pdf [file NIHMS936102-supplement-Legacy_Supplemental_File.pdf]

SUPPLEMENTAL MATERIAL

**Predictors of Thrombolysis Administration in Mild Stroke: Florida Puerto Rico**

**Collaboration to Reduce Stroke Disparities**

**Supplemental Table I:** Stepwise logistic regression to determine the effect of each factor included in the final model of multivariate analysis among mild stroke patients with thrombolysis treatment as outcome.

| <b>Demographics</b>             | <b>Univariate analysis</b>           | <b>OR (CI)</b>    | <b>P Value</b> |
|---------------------------------|--------------------------------------|-------------------|----------------|
| Age                             | Increase by 1 year                   | 0.98 (0.97,0.98)  | <.0001         |
| Race                            | NH-Black vs NH-White                 | 0.80 (0.69,0.93)  | 0.00           |
| Race                            | FL-Hispanic vs NH-White              | 0.95 (0.75,1.19)  | 0.63           |
| Race                            | PR-Hispanic vs NH-White              | 0.90 (0.53,1.53)  | 0.71           |
| Medical history<br>Stroke/TIA   | Yes vs No                            | 0.61 (0.52,0.72)  | <.0001         |
| Medical history<br>Hypertension | Yes vs No                            | 0.74 (0.64,0.87)  | 0.00           |
| Peripheral Vascular<br>Disease  | Yes vs No                            | 0.67 (0.46,0.97)  | 0.04           |
| Onset to arrival                | 0 to 2 hrs vs 3.5 hrs and<br>above   | 8.16 (4.76,13.98) | <.0001         |
| Onset to arrival                | 2 to 3.5 hrs vs 3.5 hrs and<br>above | 3.83 (2.29,6.39)  | <.0001         |
| Arrive time of day              | Off hours vs On hours                | 0.87 (0.77,0.99)  | 0.04           |
| NIHSS                           | Increase by 1                        | 1.87 (1.77,1.98)  | <.0001         |
| Aphasia                         | Yes vs No                            | 1.35 (1.12,1.62)  | 0.00           |
| Door to CT within 25<br>mins    | Missing vs No                        | 1.03 (0.65,1.63)  | 0.92           |
| Door to CT within 25<br>mins    | Yes vs No                            | 1.81 (1.53,2.15)  | <.0001         |
| Teaching hospital               | Yes vs No                            | 2.02 (1.39,2.95)  | 0.00           |
| Region                          | East Central vs South                | 1.02 (0.62,1.67)  | 0.94           |
| Region                          | North and Panhandle vs<br>South      | 1.24 (0.68,2.28)  | 0.49           |
| Region                          | West Central vs South                | 0.38 (0.24,0.61)  | <.0001         |

**Supplemental Table II:** Clinical and hospital characteristics of thrombolysed mild ischemic stroke patients by arrival to treatment time

| <b>Clinical Characteristics</b>              | <b>All thrombolysed (n=1,190)</b> | <b>Door to Needle ≤ 60 min (n=461)</b> | <b>Door to needle &gt; 60 min (n=729)</b> | <b>p value</b> |
|----------------------------------------------|-----------------------------------|----------------------------------------|-------------------------------------------|----------------|
| Age (yrs), median (IQR)                      | 68 (20)                           | 68 (21)                                | 69 (19)                                   | 0.34           |
| Sex (male), %                                | 669 (56.2)                        | 266 (57.7)                             | 403 (55.28)                               | 0.41           |
| Vascular Risk Factor, %                      |                                   |                                        |                                           |                |
| Current smoker                               | 221 (18.6)                        | 88(19.1)                               | 133 (18.2)                                | 0.71           |
| Hypertension                                 | 698 (58.7)                        | 252 (54.7)                             | 446 (61.2)                                | 0.02           |
| Diabetes mellitus                            | 277 (23.3)                        | 96 (20.8)                              | 181 (24.8)                                | 0.11           |
| Dyslipidemia                                 | 405 (34.0)                        | 134 (29.1)                             | 271 (37.2)                                | 0.004          |
| Medical History, %                           |                                   |                                        |                                           |                |
| AF                                           | 182 (15.3)                        | 64 (13.8)                              | 118 (16.2)                                | 0.28           |
| CAD/prior MI                                 | 246 (20.7)                        | 88 (19.1)                              | 158 (21.7)                                | 0.28           |
| Previous stroke/TIA                          | 212 (17.8)                        | 58 (12.6)                              | 154 (21.1)                                | <.0001         |
| Ethnicity, %                                 |                                   |                                        |                                           |                |
| NH- white                                    | 789 (66.3)                        | 281 (61.0)                             | 508 (69.7)                                | <.0001         |
| NH- black                                    | 165 (13.9)                        | 61 (13.2)                              | 104 (14.3)                                |                |
| FL-Hispanic                                  | 164 (13.8)                        | 87 (18.9)                              | 77 (10.6)                                 |                |
| PR-Hispanic                                  | 72 (6.1)                          | 32 (6.9)                               | 40 (5.5)                                  |                |
| Medical Insurance, %                         |                                   |                                        |                                           |                |
| Private*                                     | 448 (37.7)                        | 144 (31.2)                             | 304 (41.7)                                | <.0001         |
| Medicare                                     | 287 (24.1)                        | 99 (21.5)                              | 188 (25.8)                                |                |
| Medicaid/no insurance**                      | 137 (11.5)                        | 55 (11.9)                              | 82 (11.3)                                 |                |
| Unknown                                      | 318 (26.7)                        | 163 (35.4)                             | 155 (21.3)                                |                |
| Arrival Time from Onset (min), median ( IQR) | 61 (58)                           | 67 (68)                                | 60 (53)                                   | <.0001         |
| Arrival Time (%)                             |                                   |                                        |                                           | 0.01           |
| On –hours                                    | 48.5                              | 52.9                                   | 45.7                                      |                |
| Off- hours                                   | 51.5                              | 47.1                                   | 54.3                                      |                |
| Arrival time                                 |                                   |                                        |                                           |                |

|                                   |             |            |            |        |
|-----------------------------------|-------------|------------|------------|--------|
| 0-2 hours                         | 1015 (85.3) | 376 (81.6) | 639 (87.7) | <.0001 |
| 2-3.5 hours                       | 166 (14.0)  | 76 (16.5)  | 90 (12.4)  |        |
| 3.5-4.5 hours                     | 9 (0.8)     | 9 (2.0)    | 0 (0.0)    |        |
| NIHSS , median (IQR)              | 4(2)        | 4 (2)      | 4(3)       | 0.04   |
| Clinical Signs/symptoms, %        |             |            |            |        |
| Weakness                          | 672 (56.4)  | 243 (52.7) | 429 (58.9) | 0.03   |
| Aphasia                           | 491 (41.3)  | 183 (39.7) | 308 (42.3) | 0.38   |
| Altered level of Consciousness    | 56 (4.7)    | 26 (5.6)   | 30 (4.1)   | 0.22   |
| Other Neurological Signs/symptoms | 177 (14.9)  | 60 (13.0)  | 117 (16.1) | 0.15   |
| No Neurological Signs/symptoms    | 2 (0.2)     | 0 (0.0)    | 2 (0.3)    | 0.26   |
| Mode of Arrival EMS               |             |            |            | <.0001 |
| Yes                               | 788 (66.2)  | 339 (73.5) | 449 (61.6) |        |
| No                                | 290 (24.4)  | 79 (17.1)  | 211 (28.9) |        |
| Missing                           | 112 (9.4)   | 43 (9.3)   | 69 (9.5)   |        |
| Door to CT time (% <25 min)       | 755 (66.1)  | 363 (83.6) | 392 (55.4) | <.0001 |
| <b>Hospital Characteristics</b>   |             |            |            |        |
| Hospital Size                     |             |            |            | 0.66   |
| Small (<250beds)                  | 189 (15.9)  | 75 (16.3)  | 114 (15.6) |        |
| Mid (250-450 beds)                | 357 (30.0)  | 144 (31.2) | 213 (29.2) |        |
| Large (>450)                      | 644 (54.1)  | 242 (52.5) | 402 (55.1) |        |
| Academic hospital, %              | 348 (29.2)  | 156 (33.8) | 192 (26.3) | 0.006  |
| Years in GWTG, median (IQR)       | 7 (3)       | 7 (3)      | 8 (3)      | 0.06   |
| State                             |             |            |            | 0.31   |
| FL                                | 1118 (94.0) | 429 (93.1) | 689 (94.5) |        |
| PR                                | 72 (6.1)    | 32 (6.9)   | 40 (5.5)   |        |
|                                   |             |            |            |        |

AF=atrial fibrillation, CAD= Coronary Artery Disease, MI=Myocardial Infarction. NH-White= Non-Hispanic White, NH-black= Non-Hispanic black. EMS= Emergency Medical Services. \*Includes Private insurance, VA and other.\*\* Includes Medicaid, self-pay and No insurance.

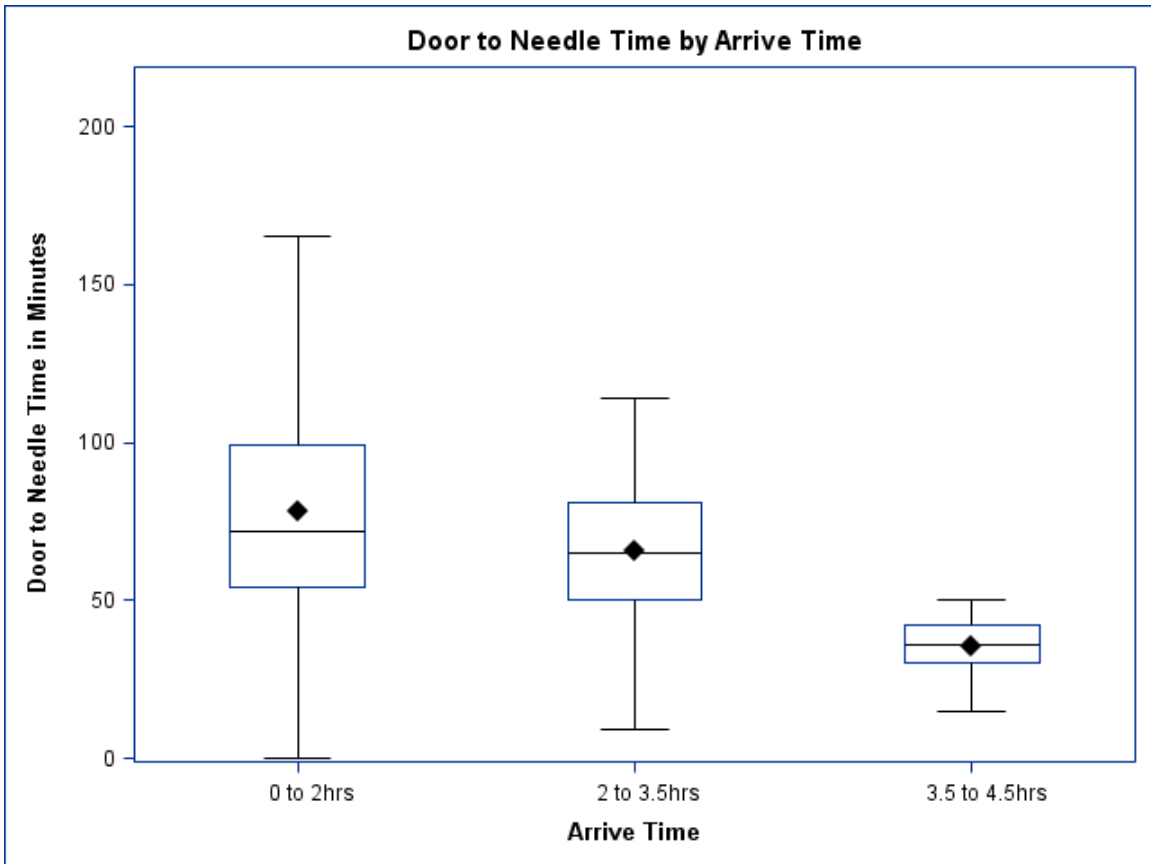

Supplemental Figure I: The distribution of Door to Needle time (DTN) based on symptoms onset to hospital arrival time.
